# Supplementary material for: Synthesis of nanoporous structured iron carbide/Fe–N–carbon composites for efficient oxygen reduction reaction in Zn–air batteries
Source: Royal Society of Chemistry journal article supplement (doi:10.1039/c6ta08050b), 2016-01-01
Supplement: c6ta08050b1.pdf [file c6ta08050b1.pdf]

# Supporting Information

## **Synthesis of Nanoporous Structured Iron Carbide/ Fe–N–Carbon Composites for Efficient Oxygen Reduction Reaction in Zn-Air Batteries†**

Zheng Kun Yang, Zhi-Wei Zhao, Kuang Liang, Xiao Zhou, Cong-Cong Shen, Ya-Nan Liu, Xin Wang, An-Wu Xu\*

Division of Nanomaterials and Chemistry, Hefei National Laboratory for Physical Sciences at Microscale, University of Science and Technology of China, Hefei 230026, China

\*To whom correspondence should be addressed.

Email: [anwuxu@ustc.edu.cn](mailto:anwuxu@ustc.edu.cn)

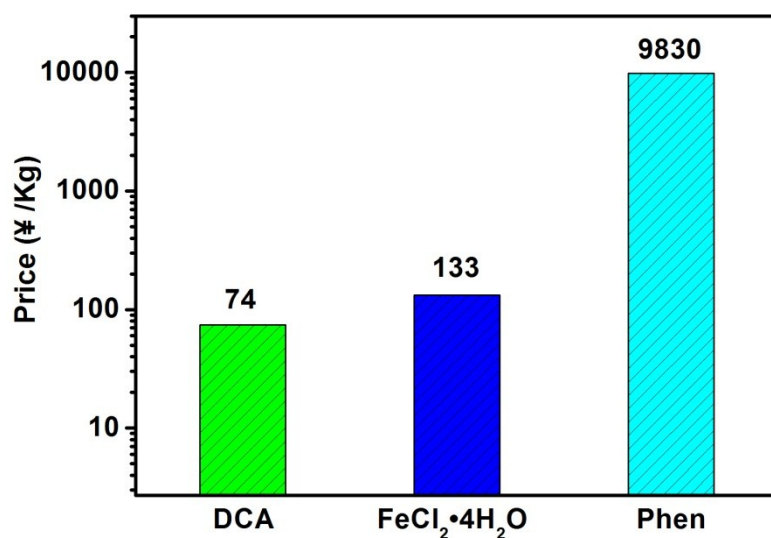

**Fig. S1** The price of chemicals for the preparation of Fe-Phen-N catalysts. The data was from Sinopharm Chemical Reagent Co. Ltd.. Website: <http://www.sinoreagent.com>.

Evaluating the cost of the Fe-Phen-N-800 sample: 0.99 g Phen: ¥ 9.73 + 0.33 g FeCl<sub>2</sub>·4H<sub>2</sub>O: ¥ 0.043 + 4.5 DCA: ¥ 0.33 = ¥ 10.10 Fe-Phen-N-800 (~ 20% yield compared with the starting materials). Therefore the cost is about ¥ 8.69 /g for Fe-Phen-N-800.

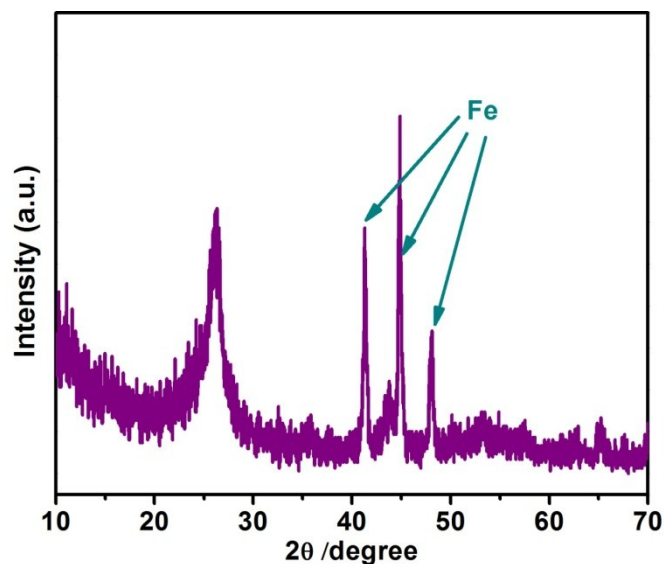

**Fig. S2** XRD pattern of Fe-Phen-N-800 catalyst before leaching in 6 M HCl solution.

**Fig. S3** shows that the decomposition of the Fe-Phen-N-800 sample divided in two stages: (i) a slight mass loss of 8.42% (crystal water release) and (ii) a sharp mass loss of 86.25% due to the decomposition of Fe-Phen-N-800 to produce  $\text{Fe}_2\text{O}_3$  material.

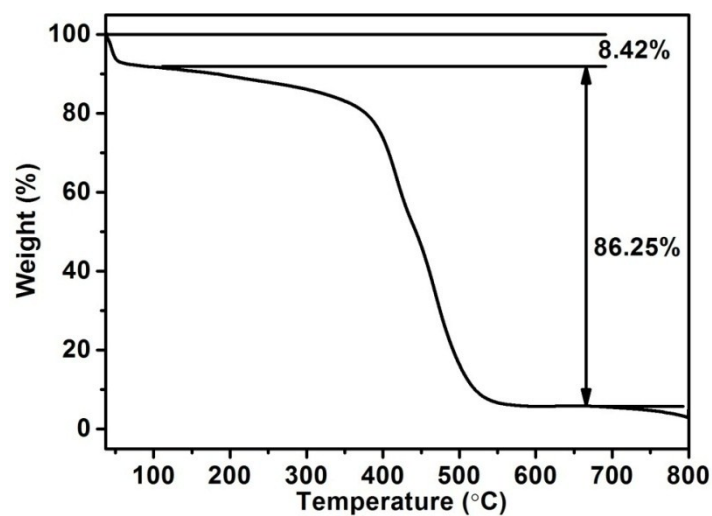

**Fig. S3** TG curve of the Fe-Phen-N-800 sample in air.

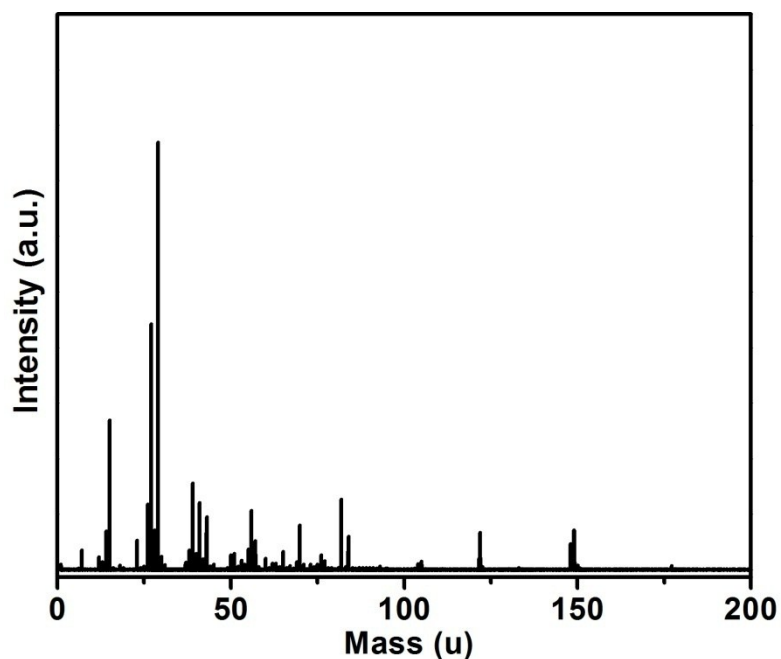

**Fig. S4** TOF-SIMS spectrum of Fe-Phen-N-800 sample.

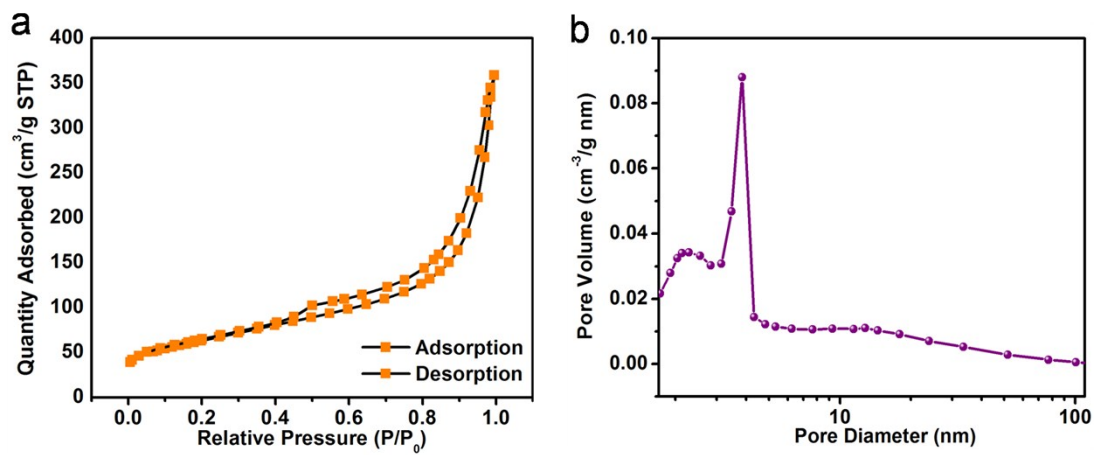

**Fig. S5** (a) N<sub>2</sub> adsorption/desorption isotherms and (b) pore distribution of Fe-Phen-N-800 catalyst.

**Table S1.** The Comparison of ORR performance of NPMCs from the recent literature and this work (electrode 1600 rpm in 0.1 M KOH medium).

| Catalysts                                     | Catalyst loading (mg cm <sup>-2</sup> ) | Onset potential (V vs RHE) | Current density (mA cm <sup>-2</sup> ) | Electron transfer numbers | Reference                              |
|-----------------------------------------------|-----------------------------------------|----------------------------|----------------------------------------|---------------------------|----------------------------------------|
| <b>Fe<sub>3</sub>C-Fe-N/C-800</b>             | 0.1                                     | 0.99                       | 5.7                                    | 4.02                      | This work                              |
| <b>LDH@ZIF-67-800</b>                         | 0.2                                     | 0.94                       | 5.5                                    | 4.0                       | Adv. Mater., 2016,28, 2337             |
| <b>Co<sub>3</sub>O<sub>4</sub>/rmGO</b>       | 0.17                                    | 0.88                       | 4.5                                    | 3.9                       | Nat. Mater. 2011, 10, 780              |
| <b>Co/N-carbon fibres</b>                     | 0.306                                   | 0.95                       | 2.2                                    | 3.9                       | Chem. Eur. J. 2015, 21, 2165           |
| <b>CoP-CMP800</b>                             | 0.6                                     | 0.85                       | 4.8                                    | 3.94                      | Adv. Mater., 2014, 26, 1450            |
| <b>Fe-N-CNFs</b>                              | 0.6                                     | 0.93                       | 5.12                                   | 3.95                      | Angew. Chem. Int. Ed., 2015, 54, 8179  |
| <b>Fe-N-CNFs</b>                              | 0.6                                     | 0.93                       | 5.1                                    | 3.93                      | Angew. Chem. Int. Ed., 2015, 54,1      |
| <b>CoII-A-rG-O</b>                            | 0.6                                     | 0.88                       | 5.3                                    | 3.95                      | Angew. Chem. Int. Ed., 2015, 54, 12622 |
| <b>N-Carbon nanotube frameworks</b>           | 0.2                                     | 0.95                       | 5.2                                    | 3.97                      | Nature Energy, 2016, 1, 15006.         |
| <b>Fe/N/C HNSs.</b>                           | 0.255                                   | /                          | 5.8                                    | 3.80                      | Nanoscale, 2015, 7, 1501               |
| <b>rGO/(Co<sup>2+</sup>-THPP)<sub>7</sub></b> | 1.0                                     | 0.86                       | 4                                      | 3.85                      | Angew. Chem. Int. Ed., 2013, 52, 5585  |
| <b>Co-N-C-NS</b>                              | 0.464                                   | 0.93                       | 5.7                                    | 3.7                       | Nanoscale,                             |

|                                  |       |      |      |      |                                                        |
|----------------------------------|-------|------|------|------|--------------------------------------------------------|
|                                  |       |      |      |      | 2015, 7,<br>10334                                      |
| <b>Fe/N/C</b>                    | 0.458 | 0.91 | 3.75 | 3.96 | Sci. Rep.,<br>2014, 4,<br>43866                        |
| <b>Fe-Nx-C</b>                   | 0.36  | 0.95 | 5    | 3.3  | Carbon, 214,<br>78 49                                  |
| <b>Fe<sub>3</sub>C@NG800-0.2</b> | 0.2   | 0.95 | 5.5  | 3.5  | ACS Appl.<br>Mater.<br>Interfaces,<br>2015,7,<br>21511 |

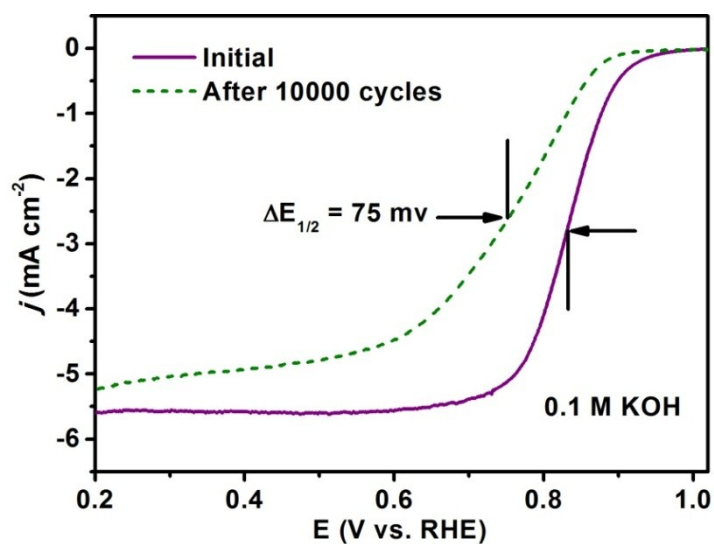

**Fig. S6** Durability test of the Pt/C catalyst for 10000 cycles in O<sub>2</sub>-saturated 0.1 M KOH solution.

**Table S2.** The Comparison of ORR performance of non-precious catalysts from the recent literature and this work (electrode 1600 rpm in 0.1 M HClO<sub>4</sub> medium)

| Catalysts                    | Catalyst loading (mg cm <sup>-2</sup> ) | Onset potential (V vs RHE) | Current density (mA cm <sup>-2</sup> ) | Electron transfer numbers | Reference                          |
|------------------------------|-----------------------------------------|----------------------------|----------------------------------------|---------------------------|------------------------------------|
| Fe <sub>3</sub> C-Fe-N/C-800 | 0.1                                     | 0.85                       | 5.6                                    | 3.98                      | This work                          |
| FP-Fe-TA-N-850               | 0.3                                     | 0.83                       | 5.5                                    | 3.5                       | Angew. Chem. Int. Ed., 2015, 54, 1 |
| N-mesoporous carbon          | 0.8                                     | 0.80                       | 4.5                                    | 3.2                       | J. Am. Chem. Soc., 2011, 133, 206  |
| N,P-mesoporous nanocarbon    | 0.45                                    | 0.83                       | 5.6                                    | 4.0                       | Nature Nanotech., 2015, 10,444     |
| Co/N/C                       | 0.6                                     | 0.83                       | 3.8                                    | 3.5                       | Chem. Eur. J., 2011, 17, 2063      |
| Fe-N-C-750                   | 0.6                                     | 0.89                       | 4.05                                   | 3.96                      | ACS Catal., 2014, 4, 3928          |

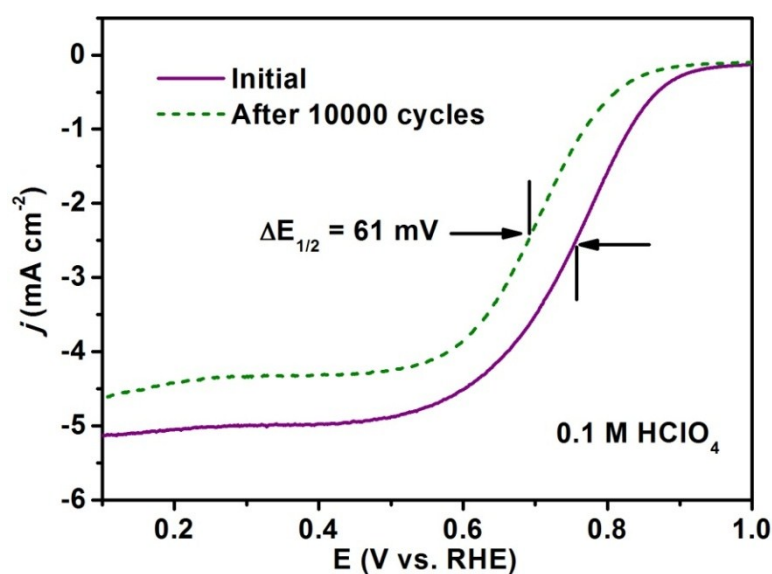

**Fig. S7** Durability test of the Pt/C catalyst for 10000 cycles in O<sub>2</sub>-saturated 0.1 M HClO<sub>4</sub> solution.

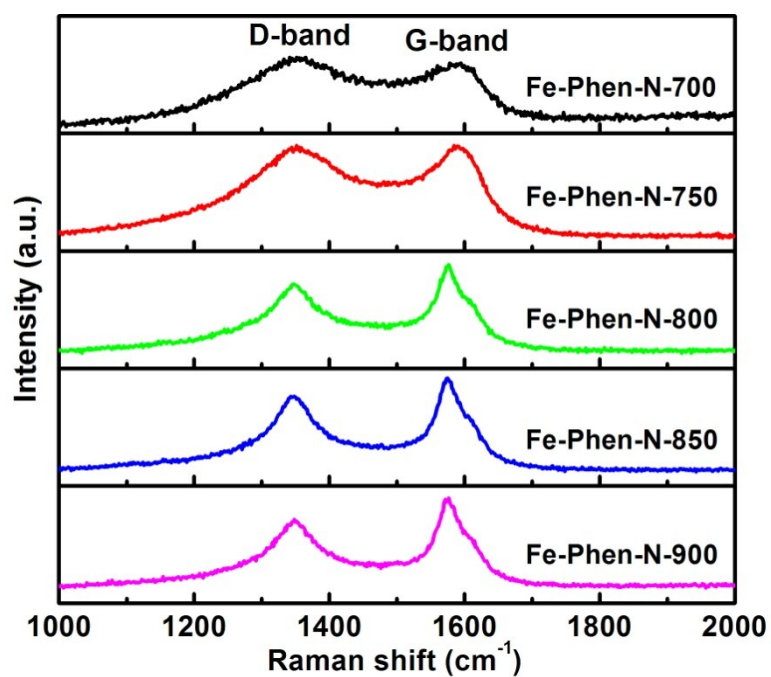

**Fig. S8** Raman spectra of Fe–Phen–N catalysts pyrolyzed at different temperatures.

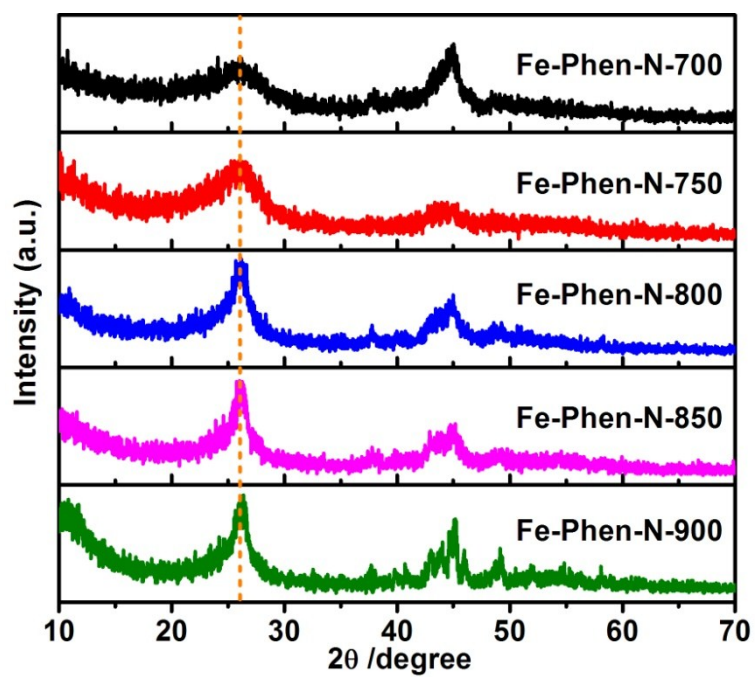

**Fig. S9** XRD patterns of Fe–Phen–N samples pyrolyzed at different temperatures.



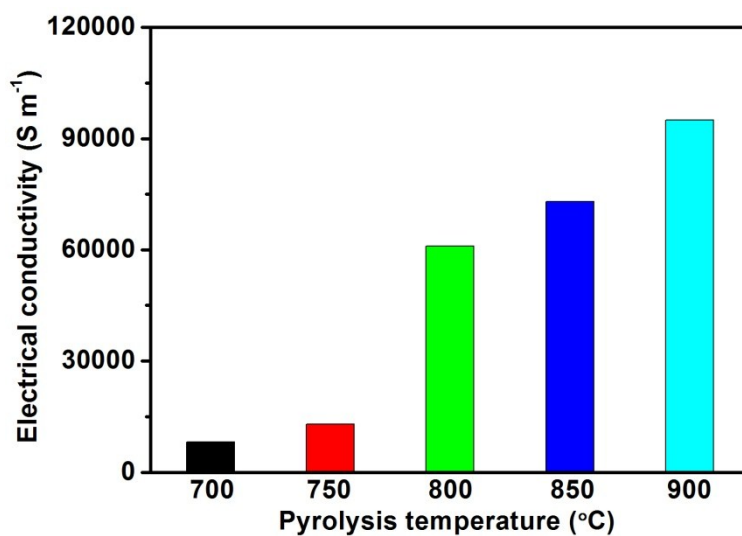

**Fig. S10** Electrical conductivity of Fe-Phen-N samples as a function of pyrolysis temperature.

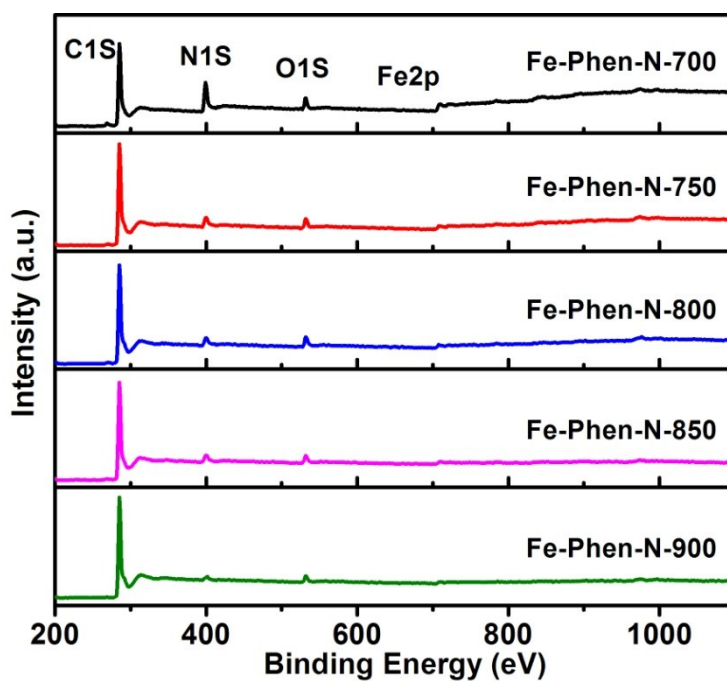

**Fig. S11** XPS survey scan of Fe-Phen-N samples pyrolyzed at different temperatures.

**Table S3.** Elemental compositions of Fe-Phen-N samples pyrolyzed at different

temperatures determined by XPS.

| Temp (°C) | C atom % | N atom % | Fe atom % | O atom % |
|-----------|----------|----------|-----------|----------|
| 700       | 75.53    | 19.22    | 0.93      | 4.32     |
| 750       | 82.27    | 12.93    | 0.81      | 3.90     |
| 800       | 89.32    | 6.25     | 0.78      | 3.65     |
| 850       | 90.36    | 5.81     | 0.62      | 3.21     |
| 900       | 93.58    | 2.92     | 0.52      | 2.98     |

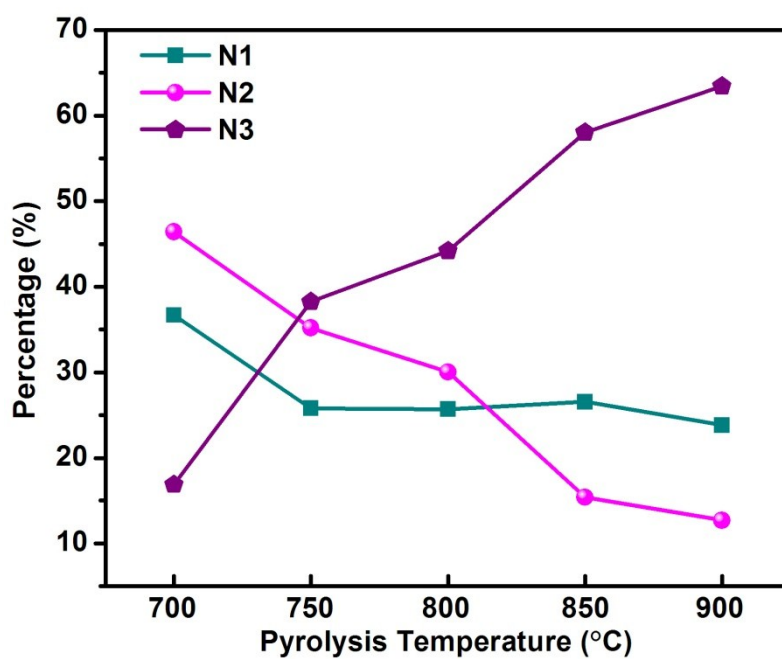

**Fig. S12** Percentage of various nitrogen species as a function of pyrolysis temperature.

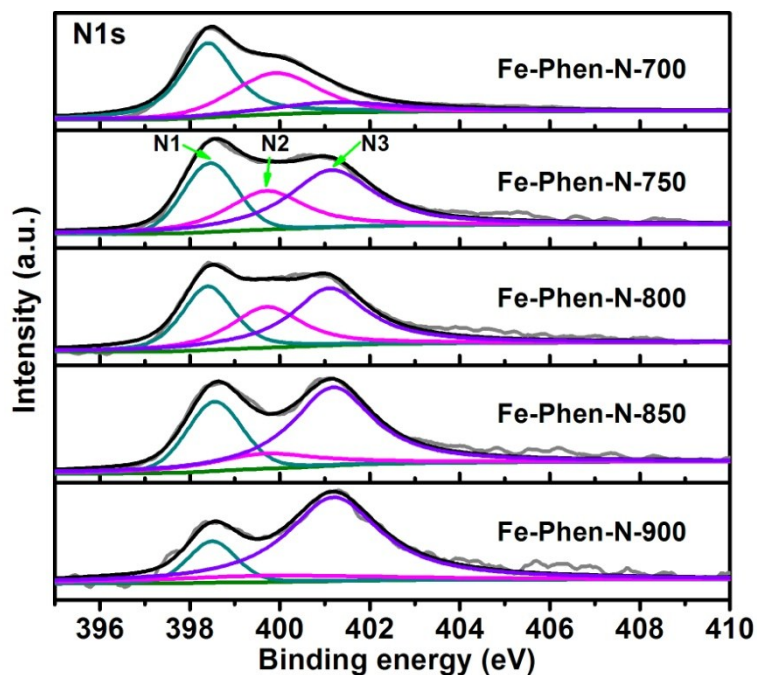

**Fig. S13.** High-resolution XPS N1s spectra of Fe-Phen-N catalysts pyrolyzed at different temperatures.

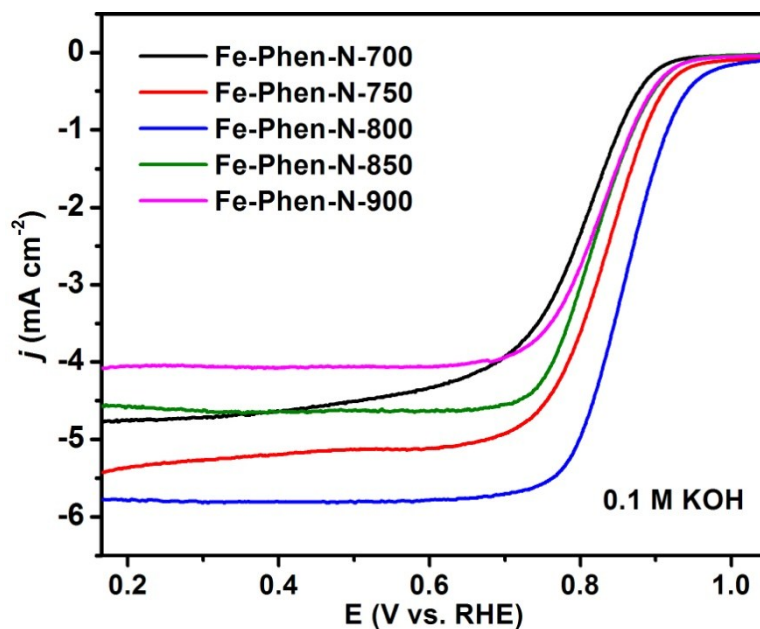

**Fig. S14** Comparison of the RDE polarization curves of Fe-Phen-N catalysts pyrolyzed at different temperatures in O<sub>2</sub>-saturated 0.1 M KOH solution at a sweep rate of 10 mV s<sup>-1</sup> and electrode rotation speed of 1600 rpm (the catalyst loading is 0.1 mg cm<sup>-2</sup>).

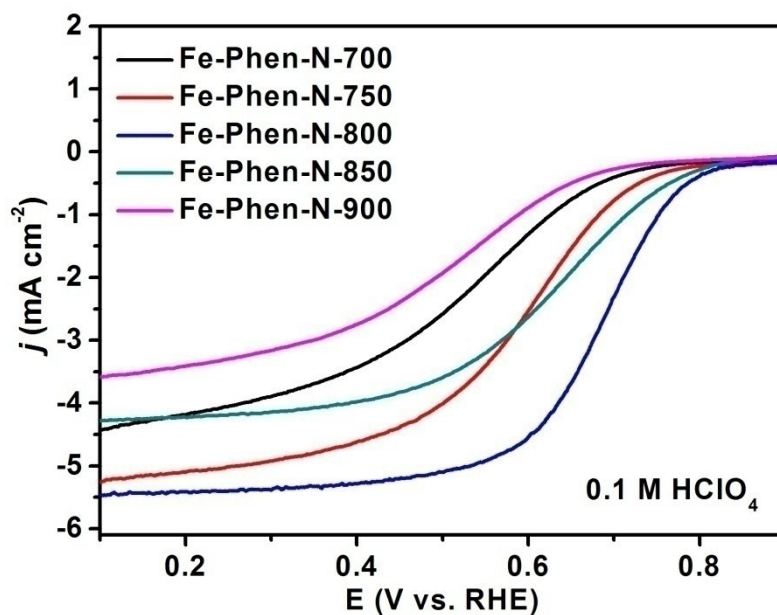

**Fig. S15** Comparison of the RDE polarization curves of Fe-Phen-N catalysts pyrolyzed at different temperatures in O<sub>2</sub>-saturated 0.1 M HClO<sub>4</sub> solution at a sweep rate of 10 mV s<sup>-1</sup> and electrode rotation speed of 1600 rpm (the catalyst loading is 0.1 mg cm<sup>-2</sup>).

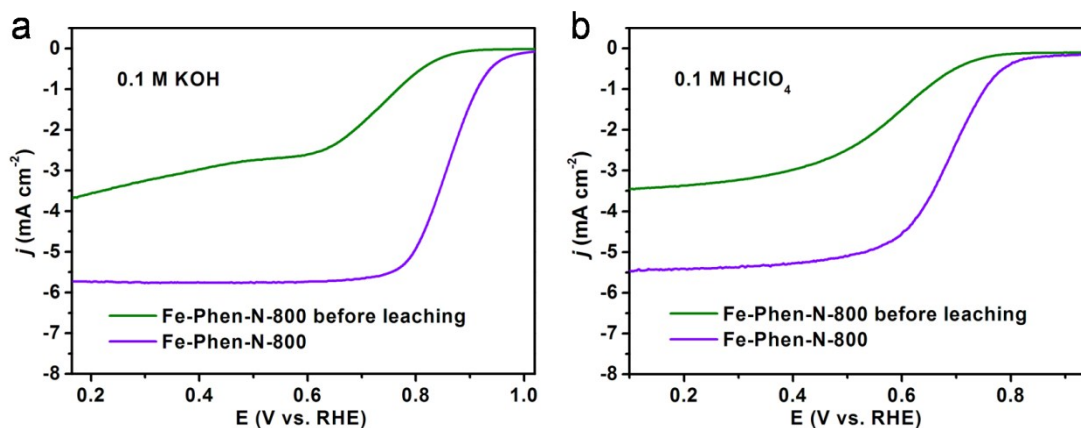

**Fig. S16** RDE polarization curves of Fe-Phen-N-800 catalyst in O<sub>2</sub>-saturated 0.1 M KOH (a) and 0.1 M HClO<sub>4</sub> (b) before and after being leached in acid.

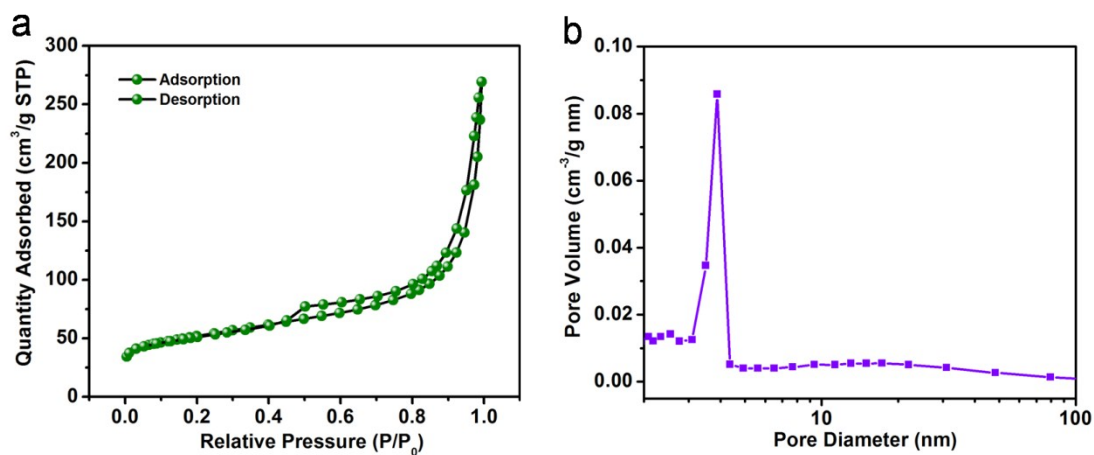

**Fig. S17** (a) N<sub>2</sub> adsorption/desorption isotherms and (b) pore distribution of Fe-Phen-N-800 catalyst before leaching.

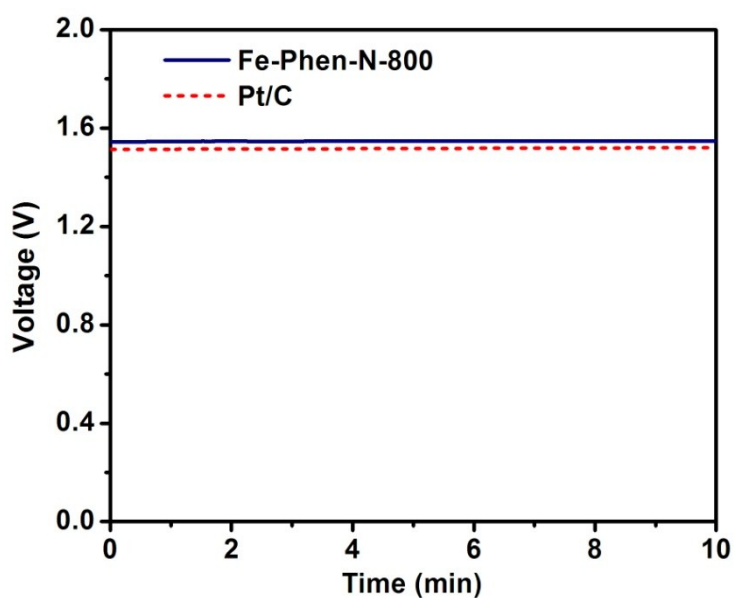

**Fig. S18** Open circuit voltage measurements of the Zn-Air batteries with Fe-Phen-N-800 and commercial Pt/C as the cathode catalysts.

**Table S4.** Comparison of the Zn-air battery performance of Fe-Phen-N-800 catalyst with reported values.

| <b>ORR Catalyst</b>                | <b>Zn electrode</b> | <b>Electrolyte</b> | <b>Voltage @ 10 mA cm<sup>-2</sup></b> | <b>Reference</b>                      |
|------------------------------------|---------------------|--------------------|----------------------------------------|---------------------------------------|
| <b>Fe-Phen-N-800</b>               | <b>Zn foil</b>      | <b>6 M KOH</b>     | <b>1.26</b>                            | <b>This work</b>                      |
| <b>N,S-GO</b>                      | Zn plate            | 6 M KOH            | 1.24                                   | Electrochim. Acta 2015, 183, 63.      |
| <b>FePc-Py-CNT</b>                 | Zn powder           | 6 M KOH            | 1.25                                   | Nat. Commun. 2013, 4, 2076            |
| <b>Fe-N-CNFs</b>                   | Zn foil             | 6 M KOH            | 1.21                                   | Angew. Chem. Int. Ed. 2015, 54, 8179. |
| <b>Amorphous MnO<sub>x</sub>/C</b> | Zn powder           | 6 M KOH            | 1.24                                   | Nano Lett. 2011, 11, 5362             |
| <b>N-doped CNTs</b>                | Zn plate            | 6 M KOH            | 1.22                                   | Electrochim. Acta 2011, 56, 5080.     |
| <b>N-CNF aerogel</b>               | Zn foil             | 6 M KOH            | 1.25                                   | Nano Energy 2015, 11, 366.            |
